# Supplementary material
Source: MDPI journal article supplement (https://www.mdpi.com/2073-4344/14/2/123)
Supplement: s1 [file s1]

# Molybdenum-Catalyzed Enantioselective Ring-Closing Metathesis/ Kinetic Resolution of Racemic Planar-Chiral 1,1'-Diallylferrocenes

Haruna Imazu,<sup>1</sup> Kakeru Masaoka,<sup>1</sup> Saki Uike,<sup>1</sup> and Masamichi Ogasawara<sup>1,2</sup>

<sup>1</sup>*Department of Natural Science, Graduate School of Science and Technology, and Research Cluster on "Development of Practical Molecular Transformation Processes", Tokushima University, Tokushima 770-8506, Japan*

<sup>2</sup>*Tokushima International Science Institute, Tokushima University, Tokushima 770-8501, Japan*

*\*e-mail: ogasawar@tokushima-u.ac.jp*

## Supplementary Materials

### Table of Contents

|                                                                  |         |
|------------------------------------------------------------------|---------|
| <sup>1</sup> H-NMR Spectra of Substrates <b>1a–d</b> . . . . .   | S2–S5   |
| <sup>1</sup> H-NMR Spectra of RCM Products <b>2a–d</b> . . . . . | S6–S9   |
| Chiral HPLC Chromatograms of <b>2a–d</b> . . . . .               | S10–S13 |

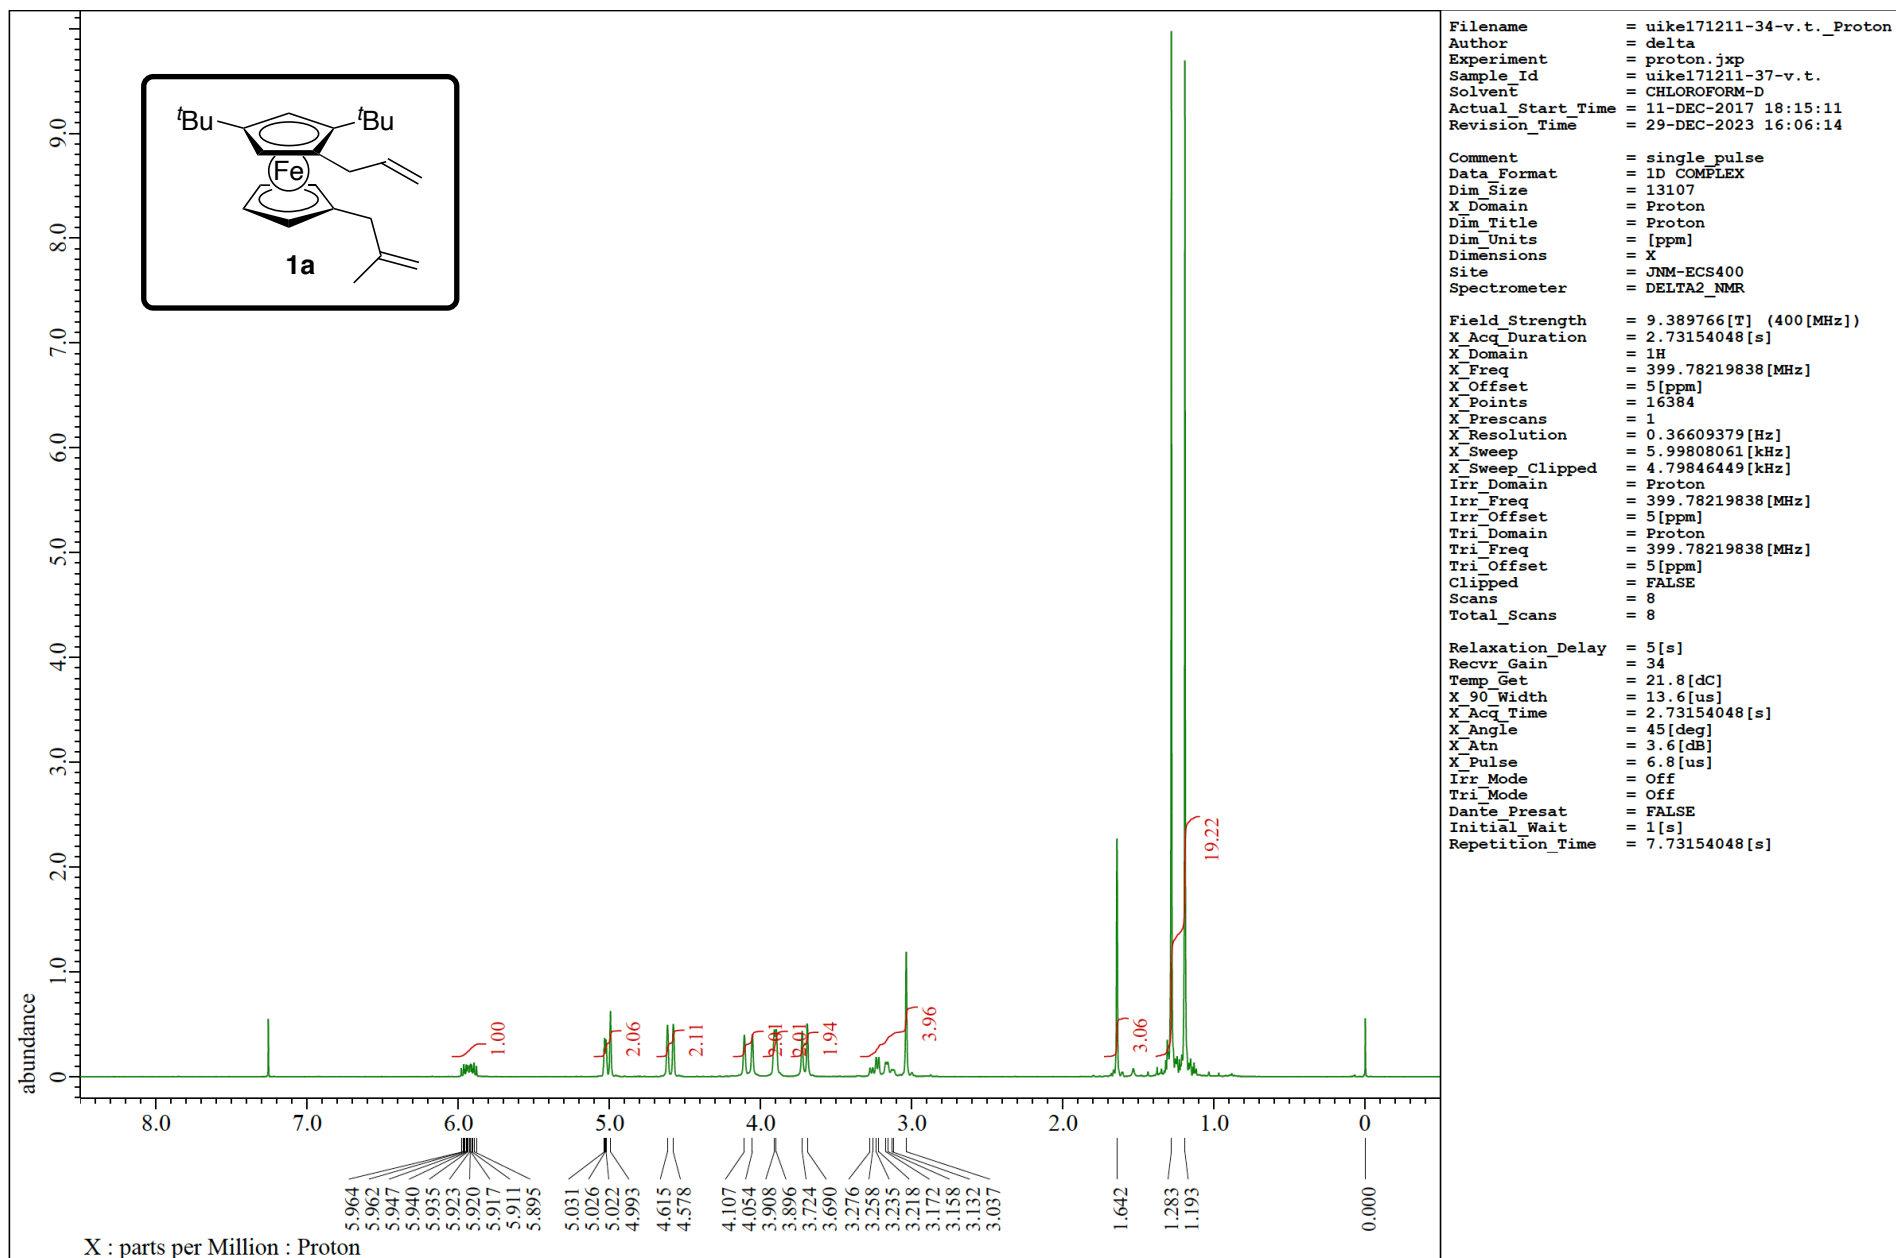

**Figure S1.** <sup>1</sup>H-NMR Spectrum of **1a** in CDCl<sub>3</sub> at 400 MHz.

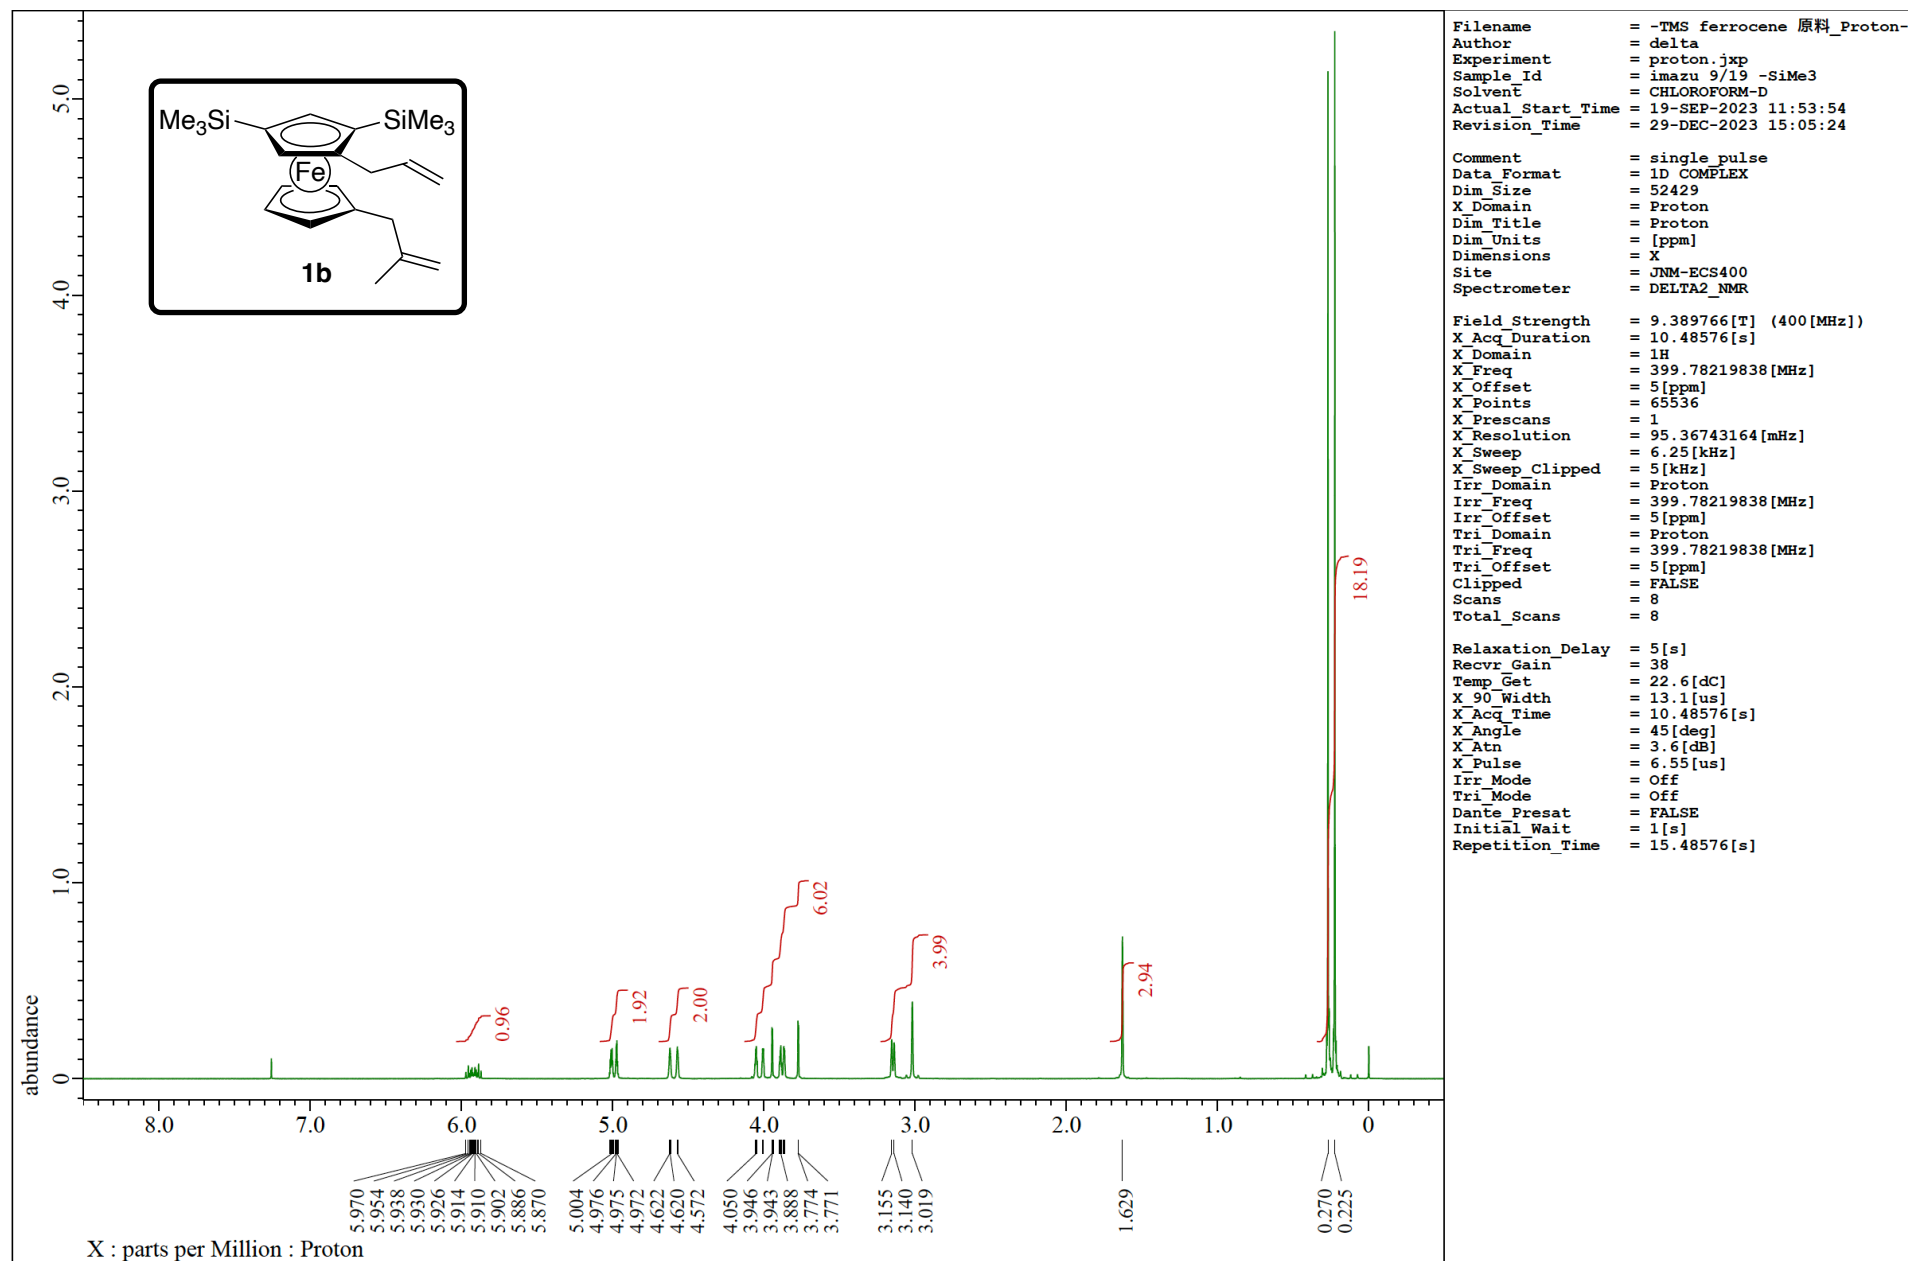

**Figure S2.** <sup>1</sup>H-NMR Spectrum of **1b** in CDCl<sub>3</sub> at 400 MHz.

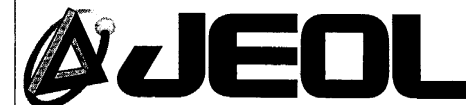

Filename = sw-119.jdf  
 Author = delta  
 Experiment = single\_pulse.ex2  
 Sample\_id = sw  
 Solvent = CHLOROFORM-D  
 Creation\_time = 24-NOV-2005 19:57:00  
 Revision\_time = 24-NOV-2005 20:19:08  
 Current\_time = 24-NOV-2005 20:19:29

Content = single\_pulse  
 Data\_format = 1D COMPLEX  
 Dim\_size = 26214  
 Dim\_title = 1H  
 Dim\_units = [ppm]  
 Dimensions = X  
 Site = ECX400  
 Spectrometer = JNM-ECX400M

Field\_strength = 9.389766[T] (400[MHz])  
 X\_acq\_duration = 5.46308096[s]  
 X\_domain = 1H  
 X\_freq = 399.78219838[MHz]  
 X\_offset = 5[ppm]  
 X\_points = 32768  
 X\_prescans = 1  
 X\_resolution = 0.18304689[Hz]  
 X\_sweep = 5.99808061[kHz]  
 Irr\_domain = 1H  
 Irr\_freq = 399.78219838[MHz]  
 Irr\_offset = 5[ppm]  
 Tri\_domain = 1H  
 Tri\_freq = 399.78219838[MHz]  
 Tri\_offset = 5[ppm]  
 Clipped = FALSE  
 Mod\_return = 1  
 Scans = 16  
 Total\_scans = 16  
 X\_90\_width = 11[us]  
 X\_acq\_time = 5.46308096[s]  
 X\_angle = 45[deg]  
 X\_atn = 2.6[dB]  
 X\_pulse = 5.5[us]  
 Irr\_mode = Off  
 Tri\_mode = Off  
 Dante\_presat = FALSE  
 Initial\_wait = 1[s]  
 Recvr\_gain = 36  
 Relaxation\_delay = 1.66961[s]  
 Repetition\_time = 7.13269096[s]  
 Temp\_get = 22.5[dC]

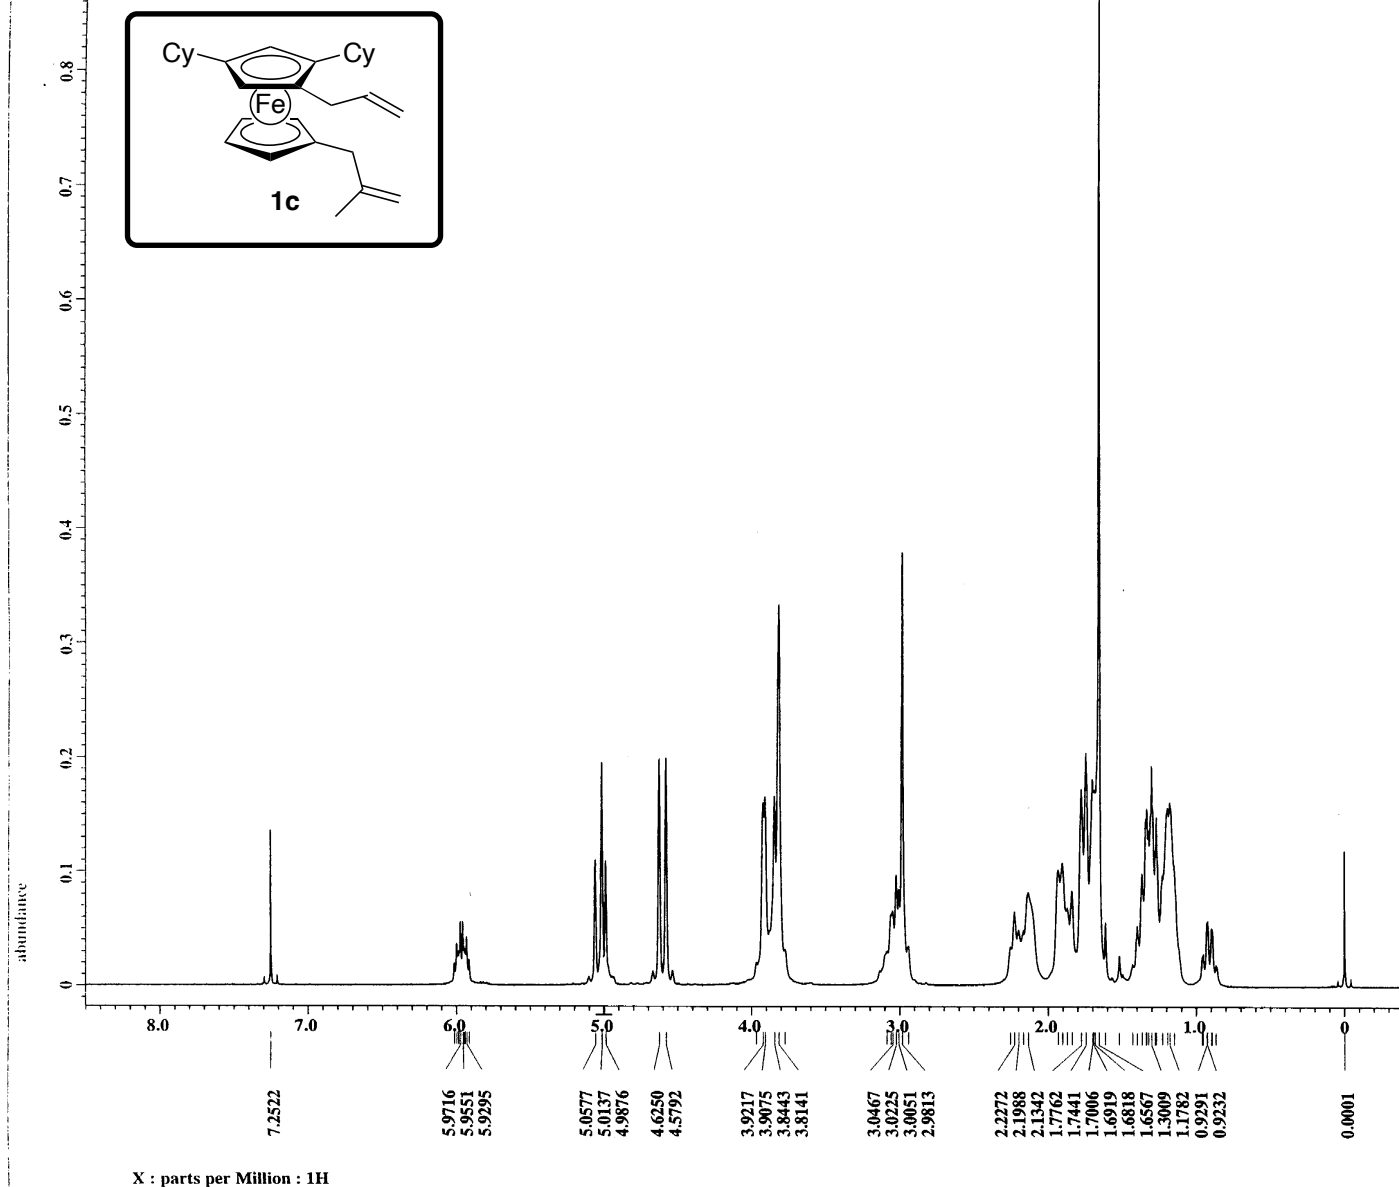

Figure S3. <sup>1</sup>H-NMR Spectrum of 1c in CDCl<sub>3</sub> at 400 MHz.

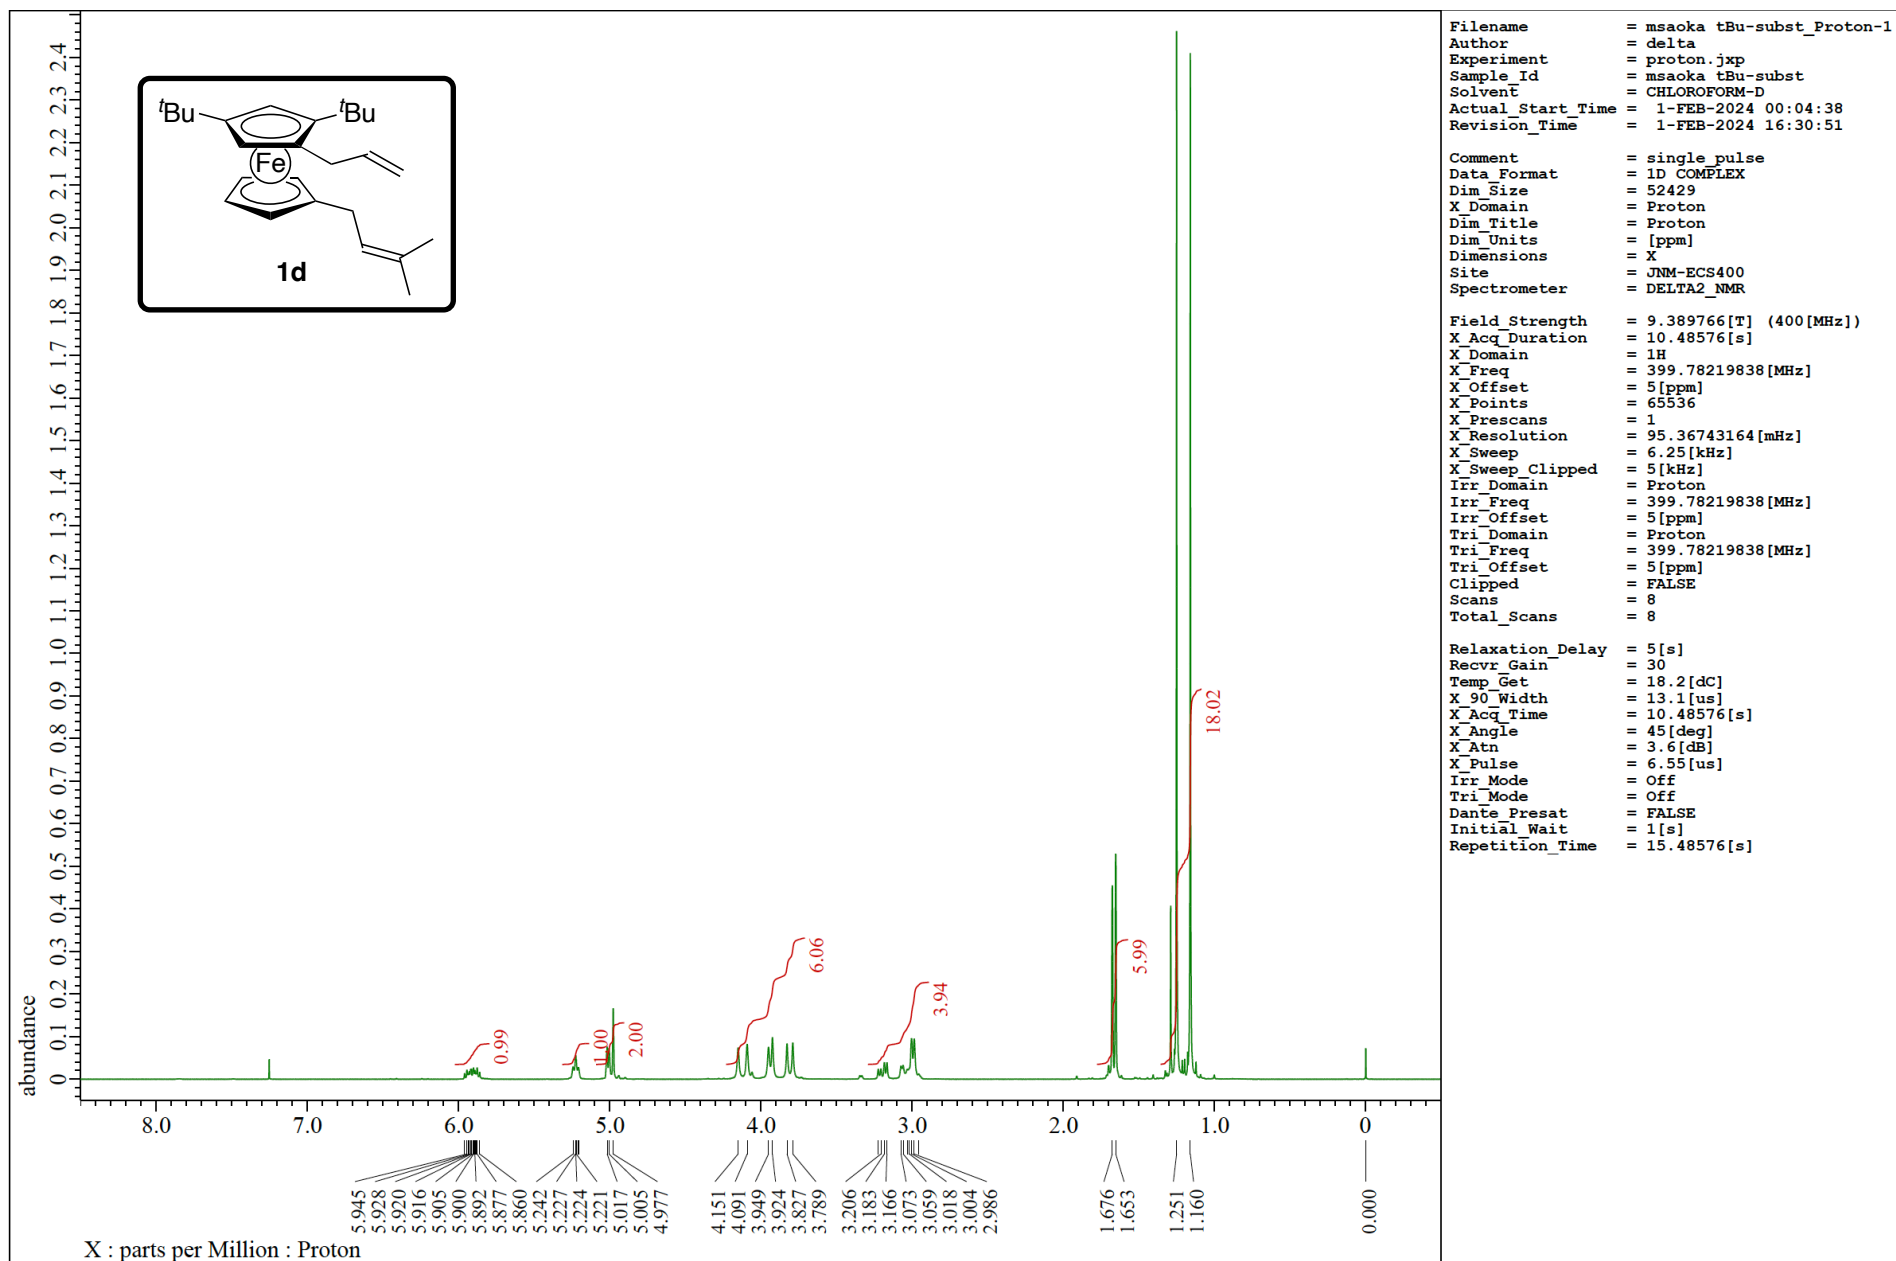

**Figure S4.**  $^1\text{H}$ -NMR Spectrum of **1d** in  $\text{CDCl}_3$  at 400 MHz.

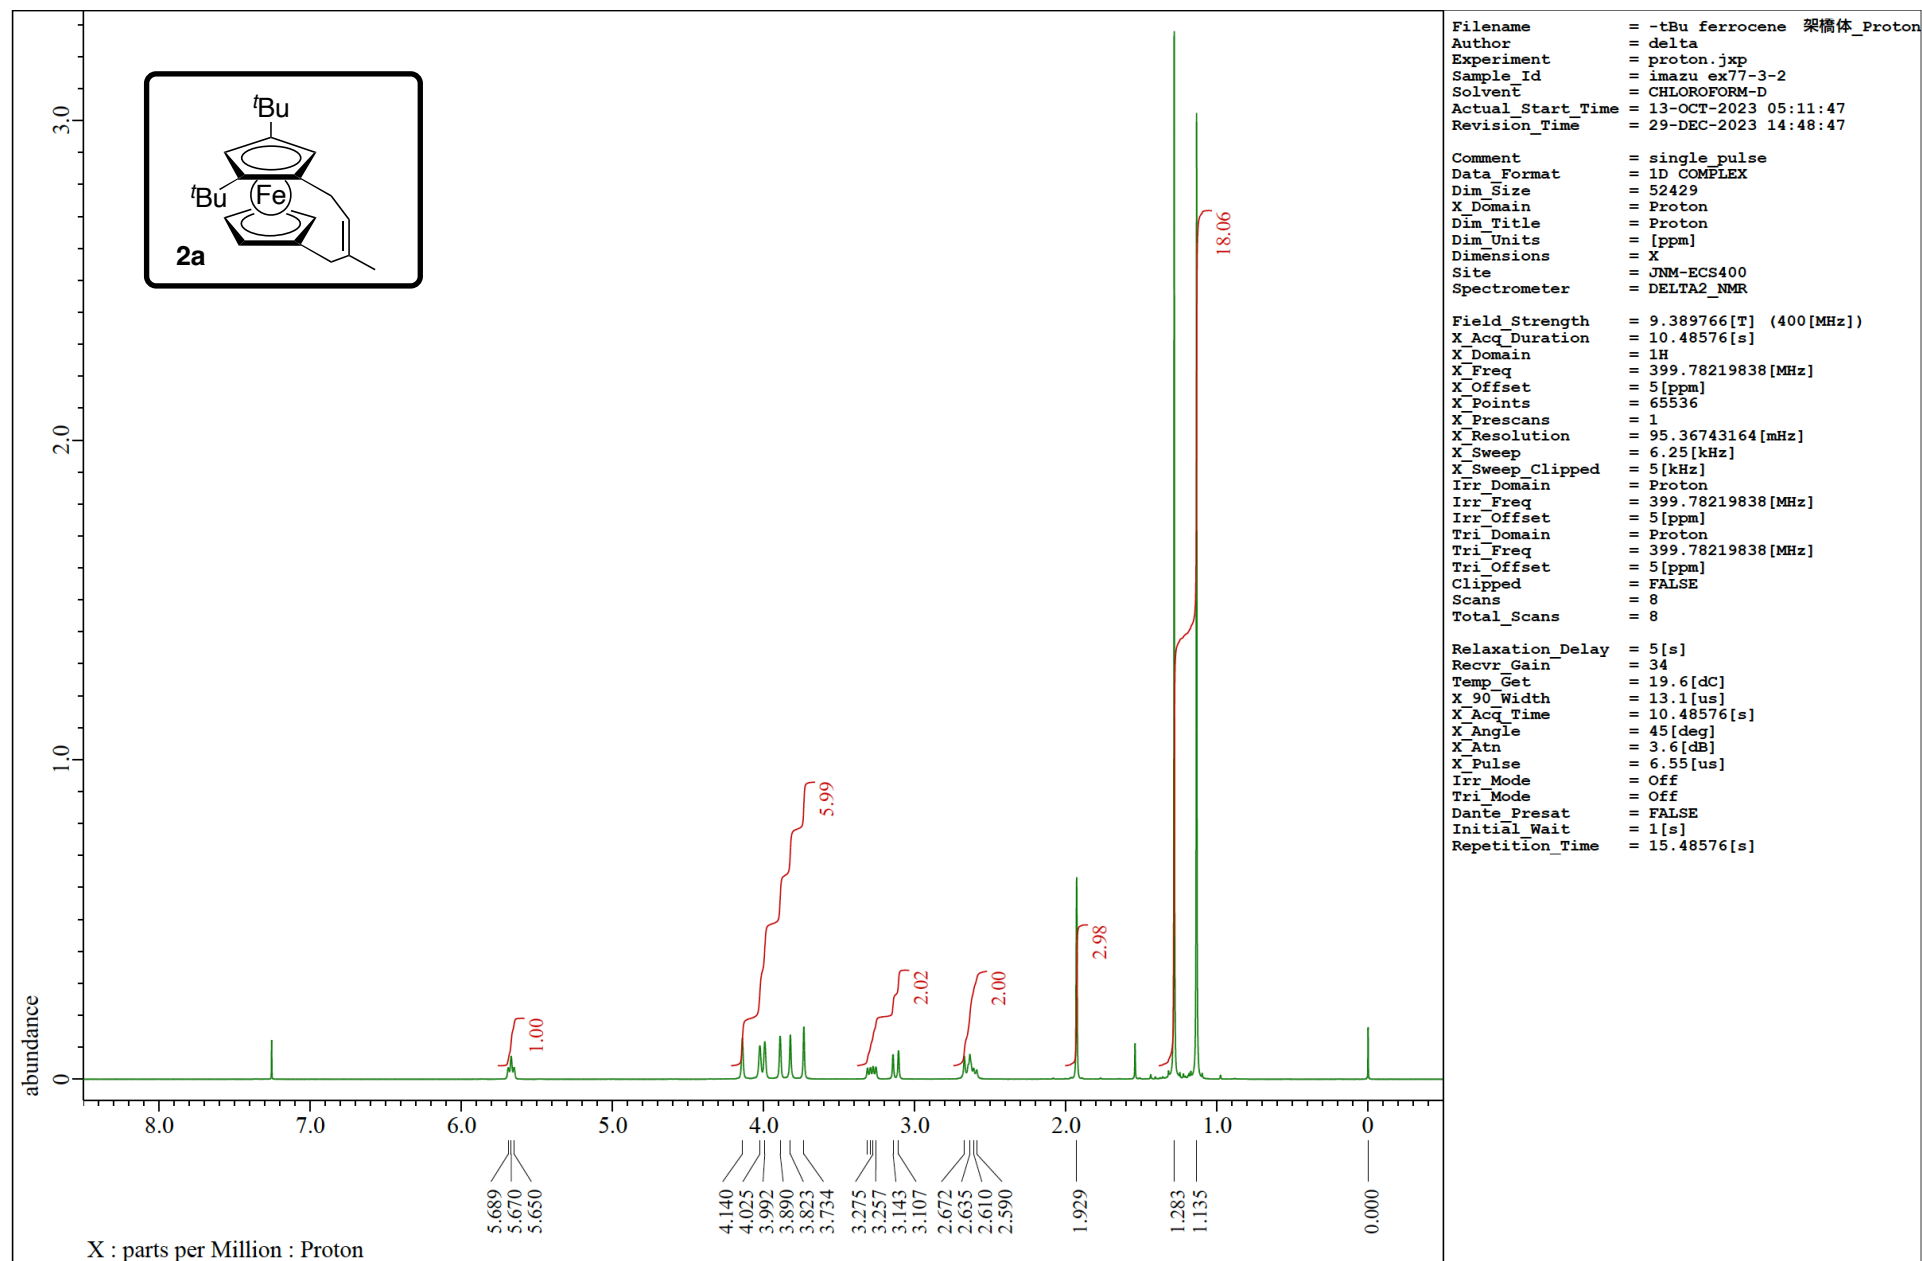

**Figure S5.** <sup>1</sup>H-NMR Spectrum of **2a** in CDCl<sub>3</sub> at 400 MHz.

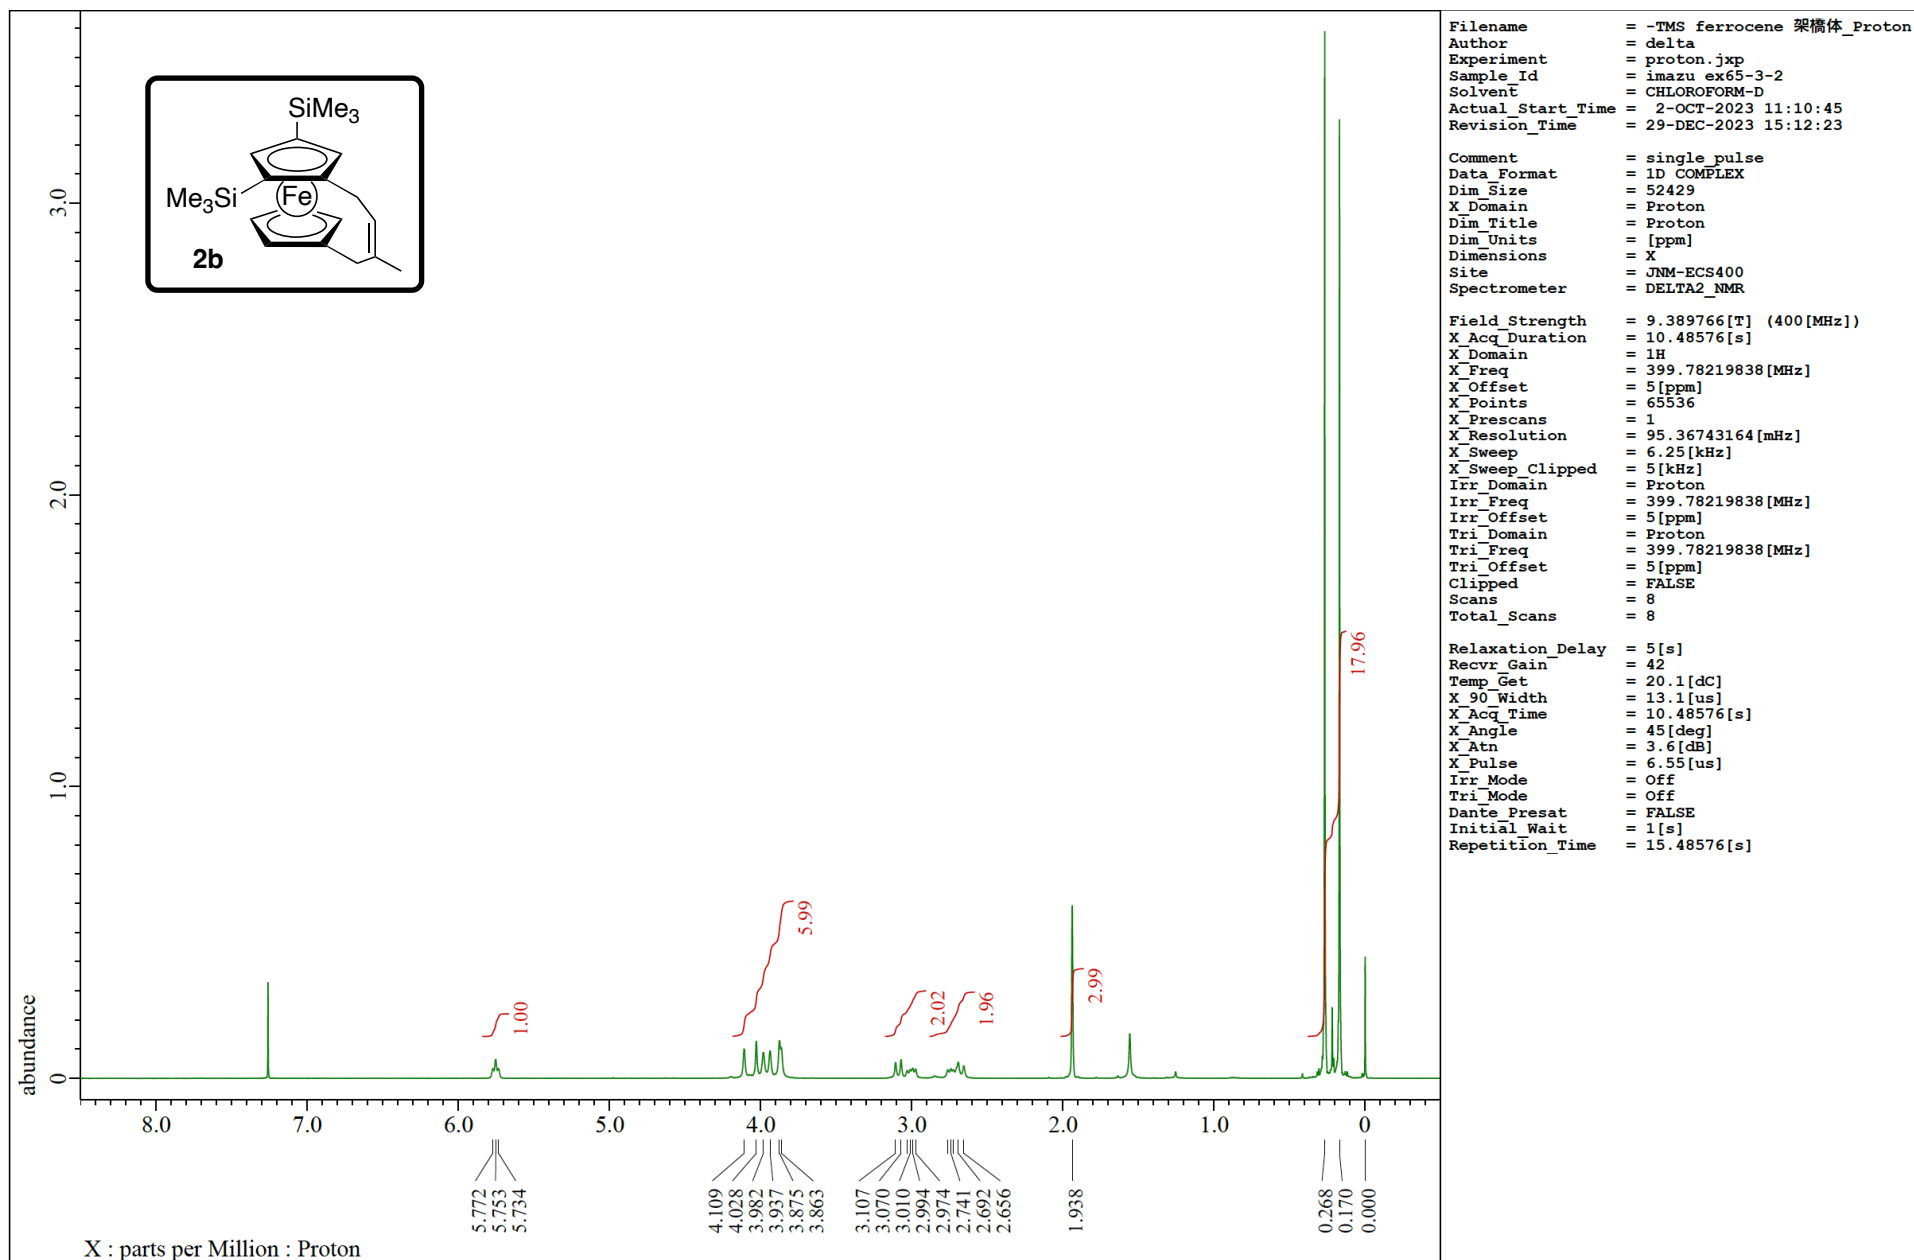

**Figure S6.** <sup>1</sup>H-NMR Spectrum of **2b** in CDCl<sub>3</sub> at 400 MHz.

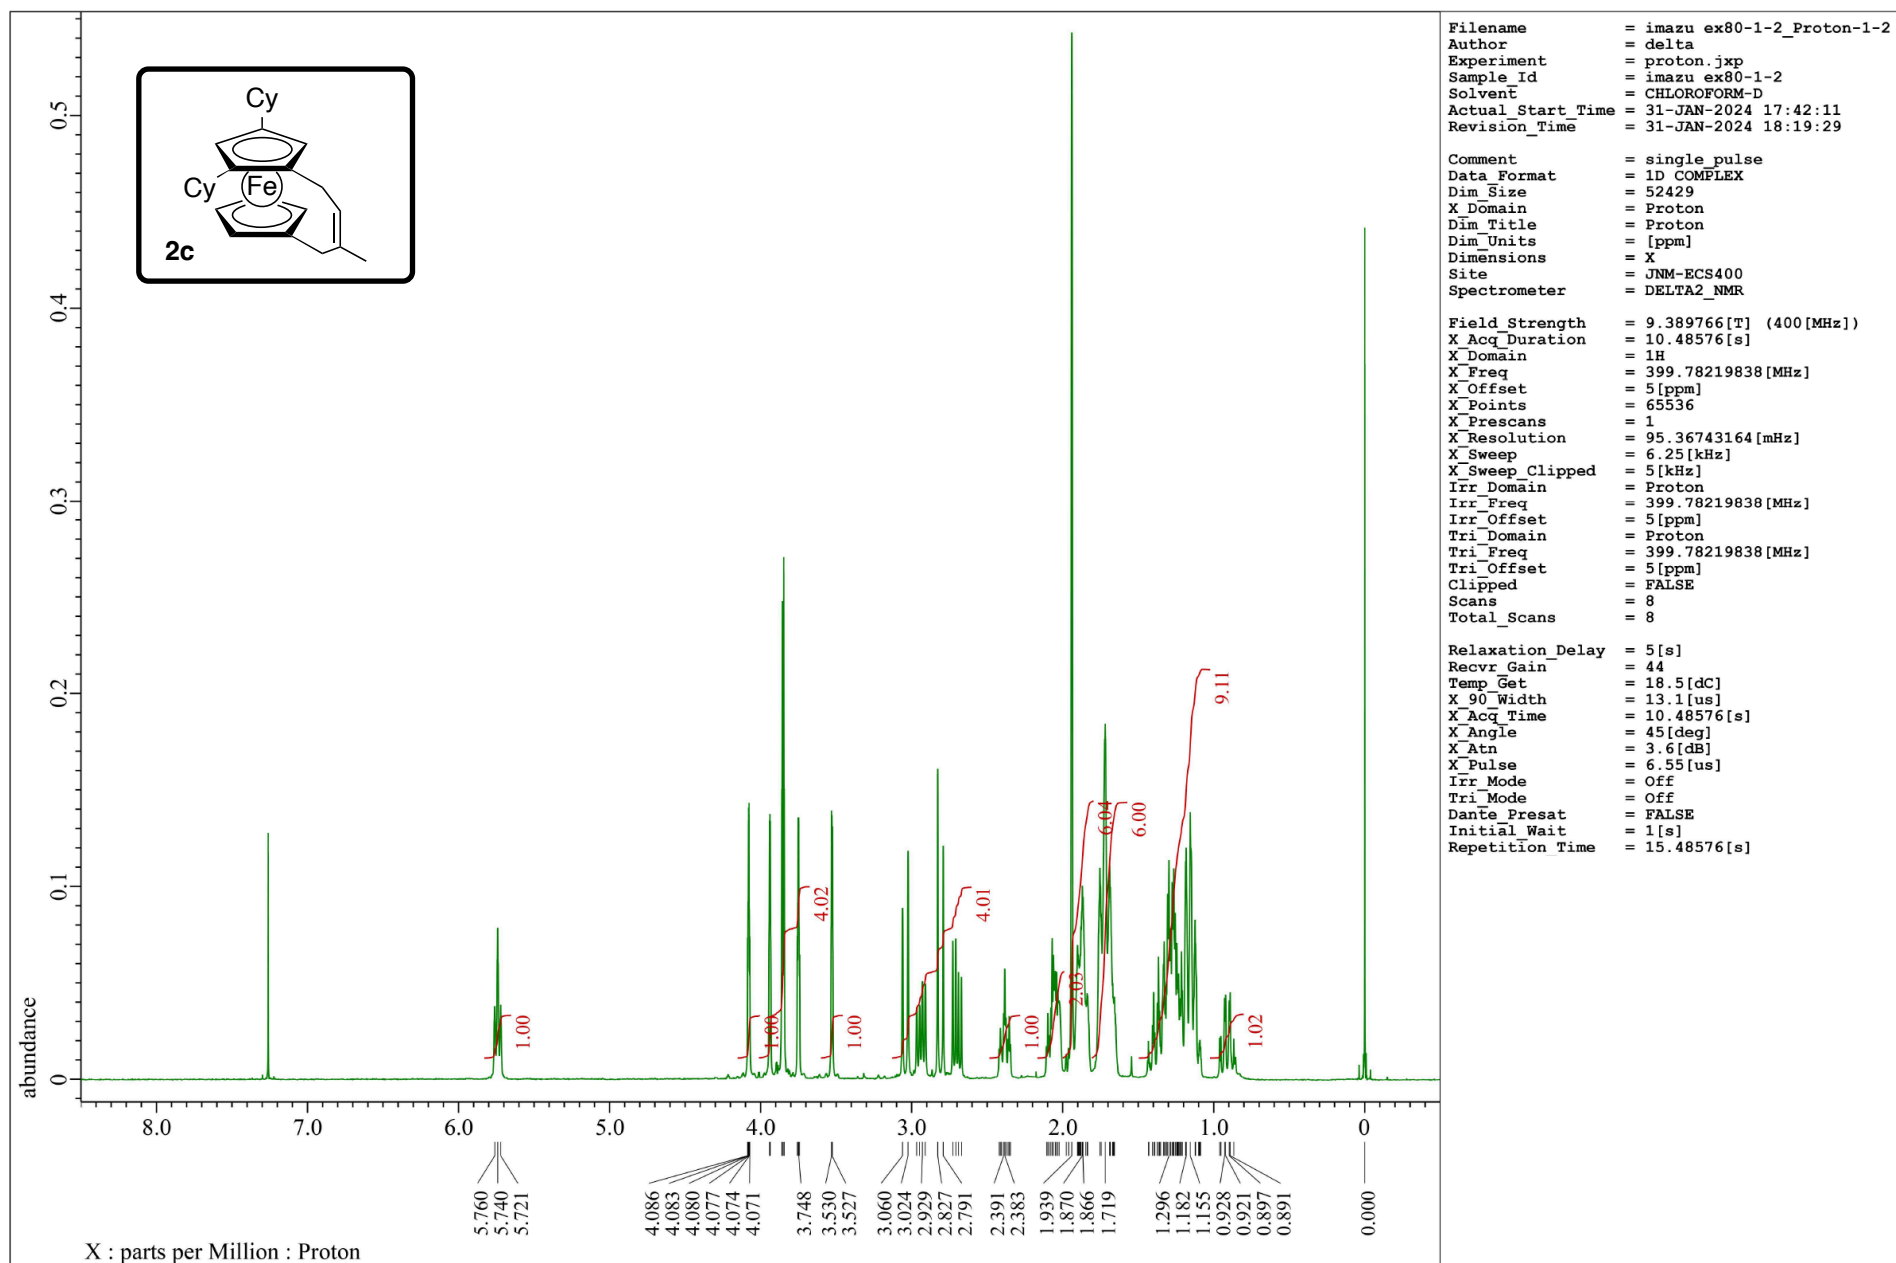

**Figure S7.** <sup>1</sup>H-NMR Spectrum of **2c** in CDCl<sub>3</sub> at 400 MHz.



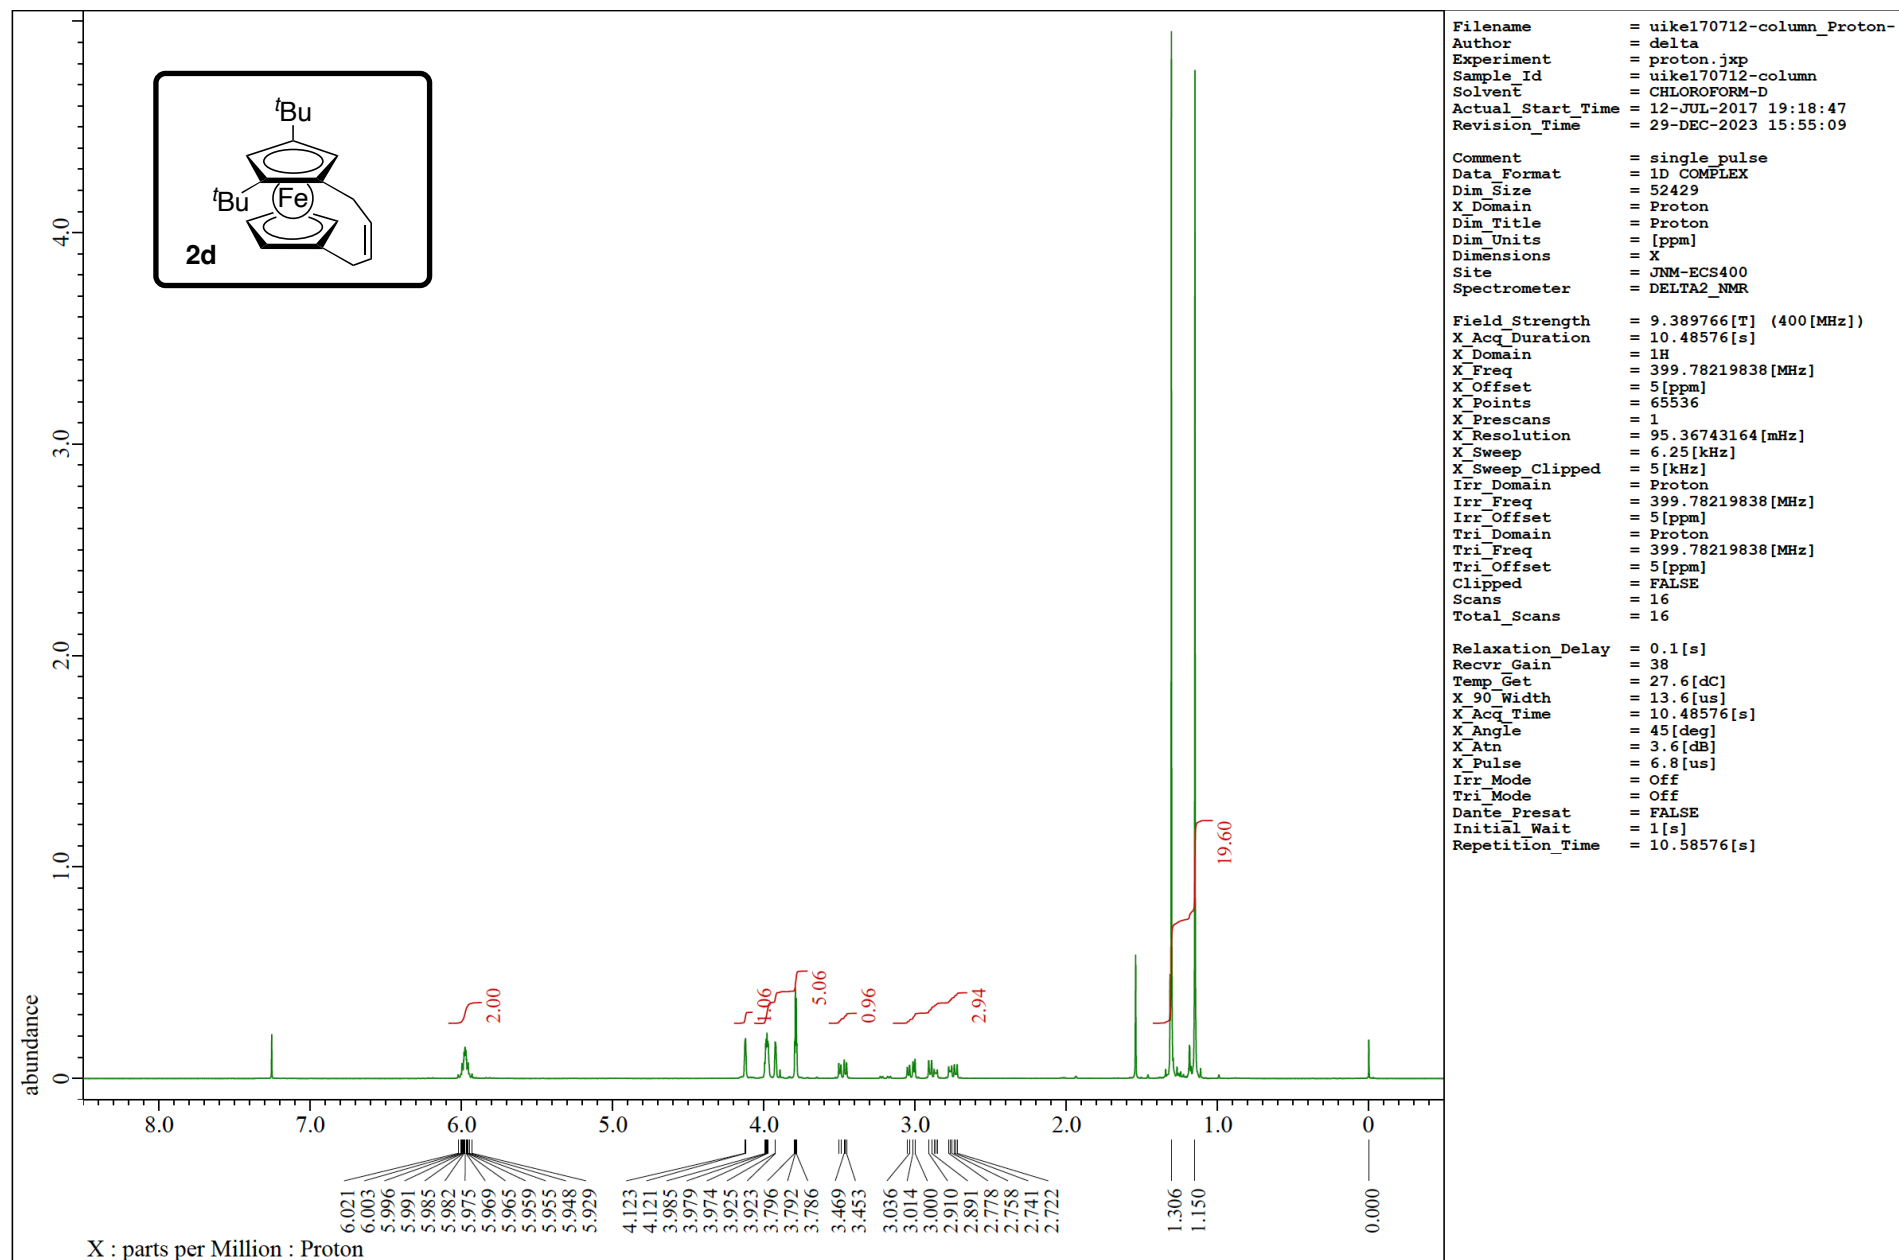

**Figure S8.** <sup>1</sup>H-NMR Spectrum of **2d** in CDCl<sub>3</sub> at 400 MHz.

**Figure S9.** Chiral HPLC Analysis of **2a** (Table 1, Entry 4).  
Chiralcel OD-H; eluent: hexane/*i*PrOH = 2000/1; flow rate: 1.0 mL/min.

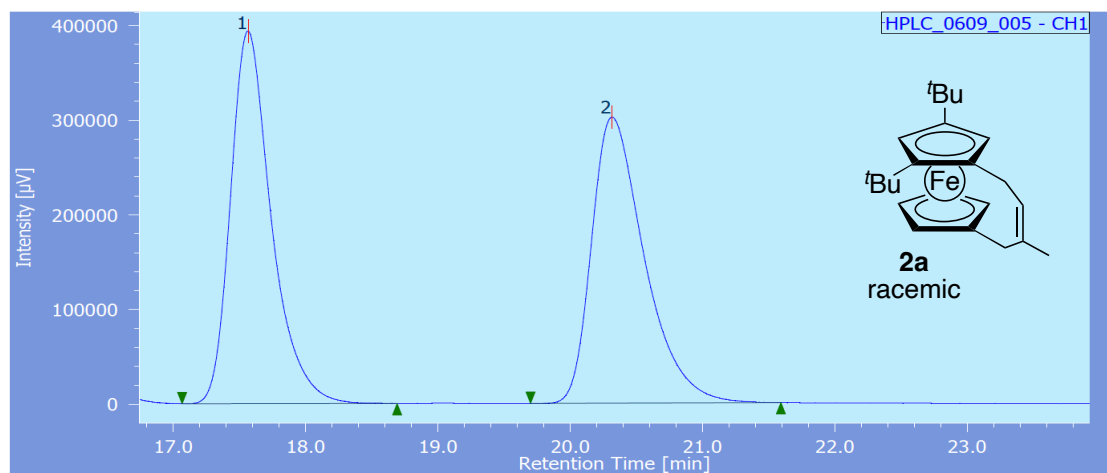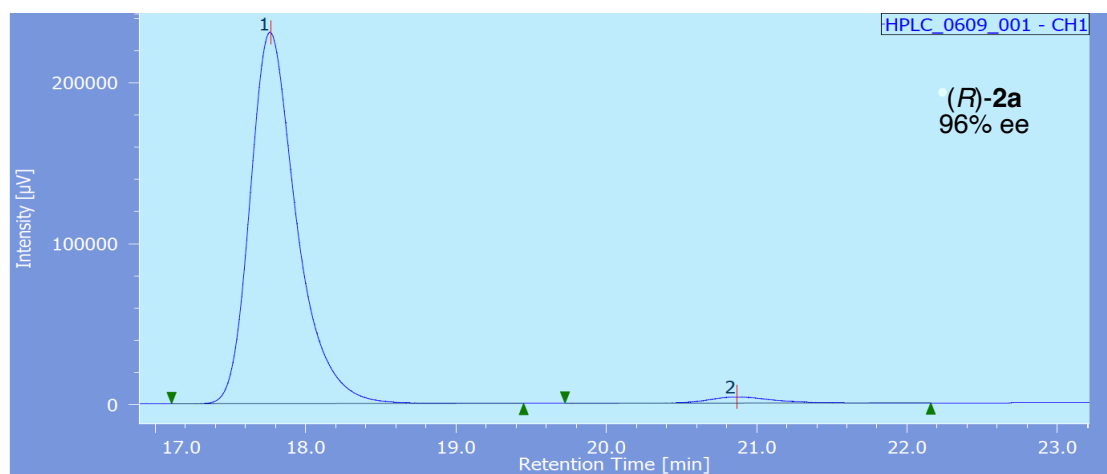

| # | peak name  | CH | tR [min] | area [μV·sec] | height [μV] | area % | height % | NTP   | resolution | symmetry coefficient |
|---|------------|----|----------|---------------|-------------|--------|----------|-------|------------|----------------------|
| 1 | (R)-isomer | 1  | 17.767   | 4962831       | 230740      | 97.783 | 98.367   | 17415 | 4.867      | 1.342                |
| 2 | (S)-isomer | 1  | 20.867   | 112544        | 3831        | 2.217  | 1.633    | 12765 | N/A        | 1.265                |

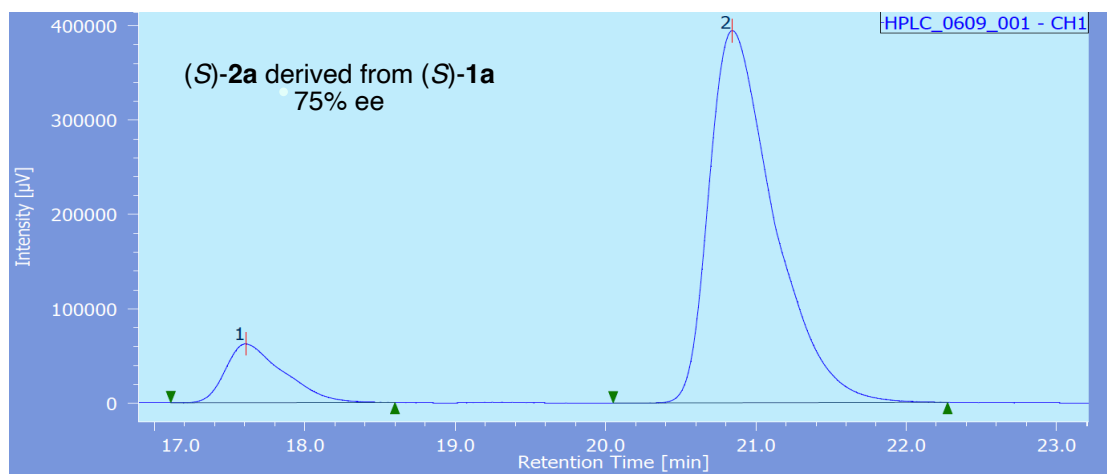

| # | peak name  | CH | tR [min] | area [μV·sec] | height [μV] | area % | height % | NTP   | resolution | symmetry coefficient |
|---|------------|----|----------|---------------|-------------|--------|----------|-------|------------|----------------------|
| 1 | (R)-isomer | 1  | 17.608   | 1661901       | 62385       | 12.313 | 13.660   | 10101 | 4.454      | 1.568                |
| 2 | (S)-isomer | 1  | 20.842   | 11835420      | 394315      | 87.687 | 86.340   | 12193 | N/A        | 1.660                |

**Figure S10.** Chiral HPLC Analysis of **2b** (Table 1, Entry 11).  
Chiralcel OD-H; eluent: hexane/*i*PrOH = 2000/1; flow rate: 1.0 mL/min.

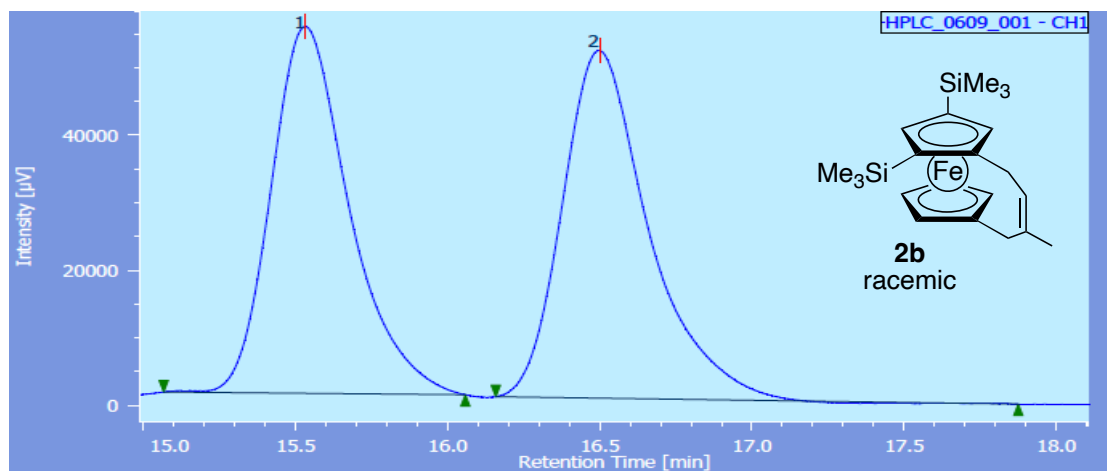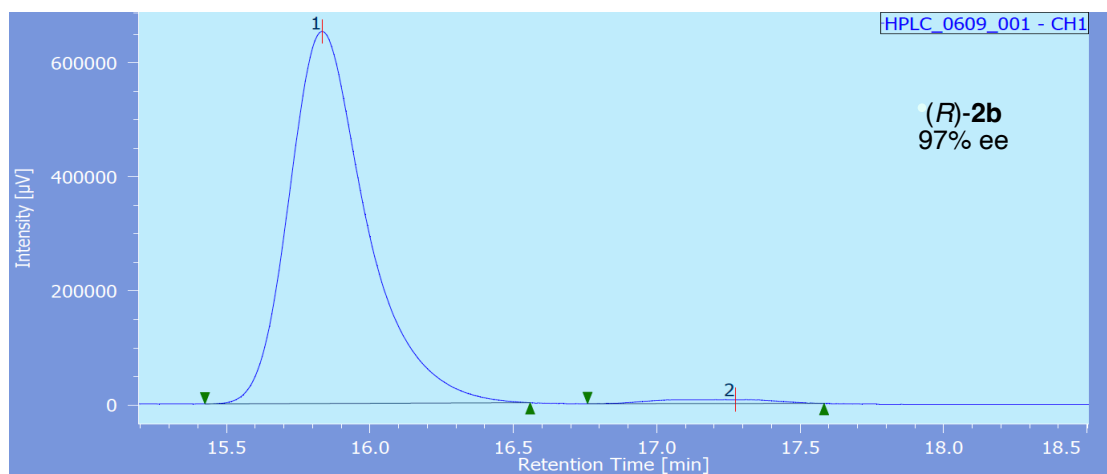

| # | peak name  | CH | tR [min] | area [μV·sec] | height [μV] | area % | height % | NTP   | resolution | symmetry coefficient |
|---|------------|----|----------|---------------|-------------|--------|----------|-------|------------|----------------------|
| 1 | (R)-isomer | 1  | 15.833   | 12263708      | 651920      | 98.367 | 98.942   | 18134 | 2.206      | 1.381                |
| 2 | (S)-isomer | 1  | 17.275   | 203654        | 6972        | 1.633  | 1.058    | 6761  | N/A        | 0.819                |

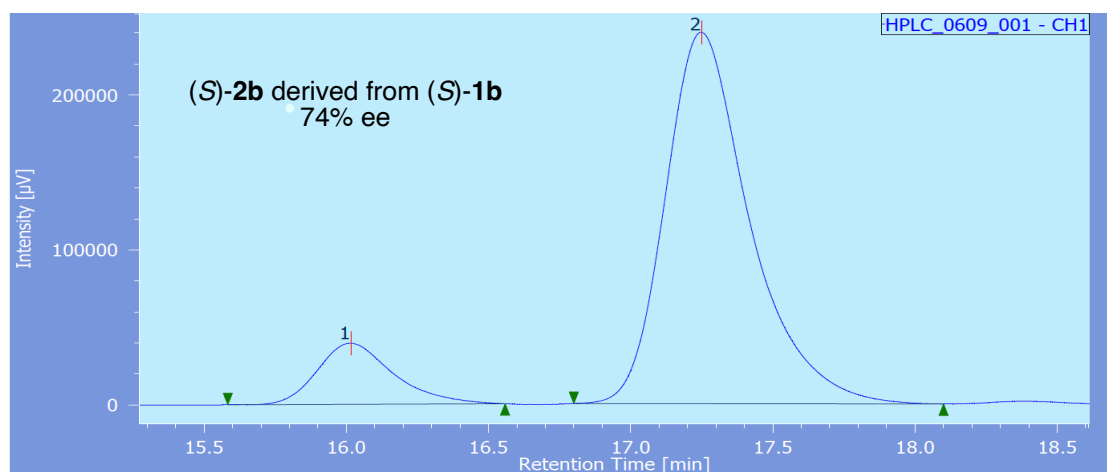

| # | peak name  | CH | tR [min] | area [μV·sec] | height [μV] | area % | height % | NTP   | resolution | symmetry coefficient |
|---|------------|----|----------|---------------|-------------|--------|----------|-------|------------|----------------------|
| 1 | (R)-isomer | 1  | 16.017   | 731302        | 39365       | 12.867 | 14.117   | 18471 | 2.499      | 1.300                |
| 2 | (S)-isomer | 1  | 17.250   | 4952047       | 239483      | 87.133 | 85.883   | 17731 | N/A        | 1.353                |

**Figure S11.** Chiral HPLC Analysis of **2c** (Table 1, Entry 17).  
Chiralcel OD-H; eluent: hexane; flow rate: 0.5 mL/min.

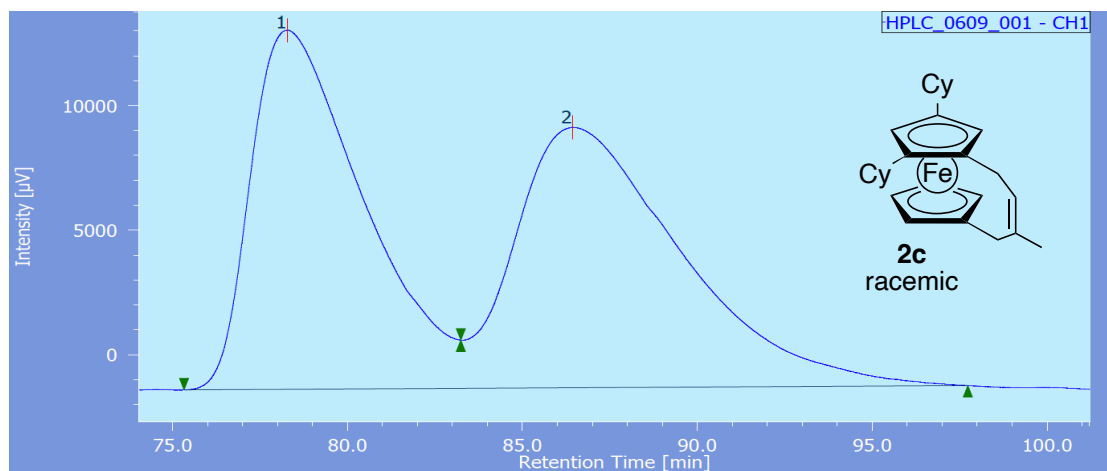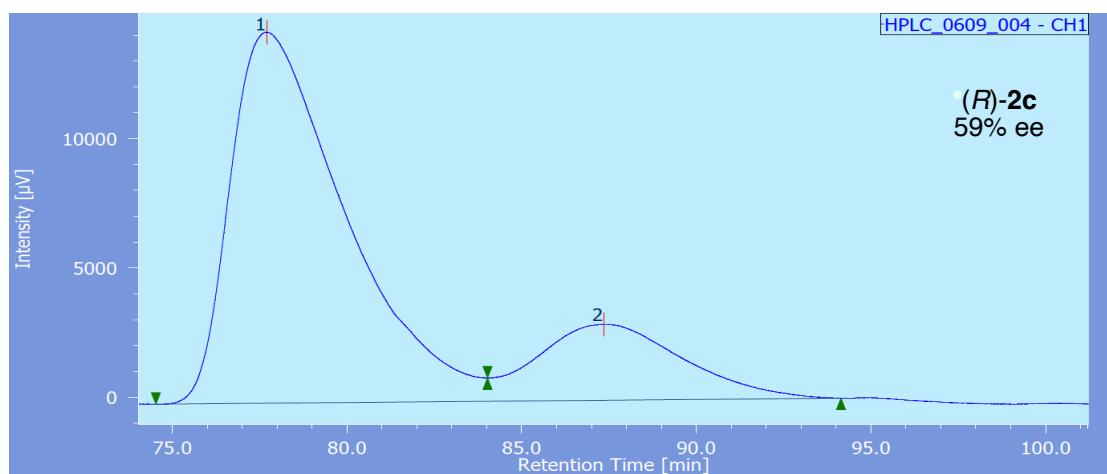

| # | peak name  | CH | tR [min] | area [μV·sec] | height [μV] | area % | height % | NTP  | resolution | symmetry coefficient |
|---|------------|----|----------|---------------|-------------|--------|----------|------|------------|----------------------|
| 1 | (R)-isomer | 1  | 77.708   | 3276973       | 14329       | 79.336 | 83.006   | 2783 | 1.416      | N/A                  |
| 2 | (S)-isomer | 1  | 87.358   | 853520        | 2934        | 20.664 | 16.994   | 2022 | N/A        | N/A                  |

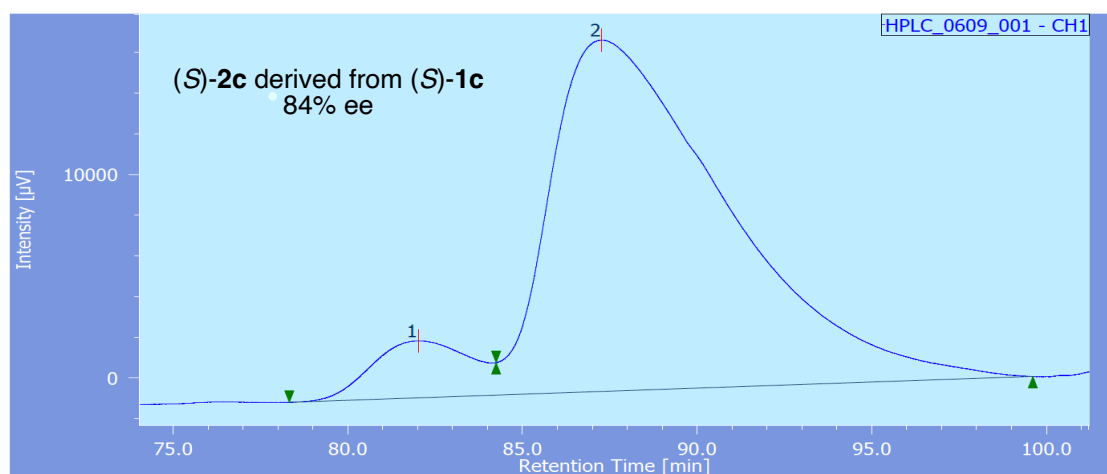

| # | peak name  | CH | tR [min] | area [μV·sec] | height [μV] | area % | height % | NTP  | resolution | symmetry coefficient |
|---|------------|----|----------|---------------|-------------|--------|----------|------|------------|----------------------|
| 1 | (R)-isomer | 1  | 82.017   | 532648        | 2796        | 8.080  | 13.946   | N/A  | N/A        | N/A                  |
| 2 | (S)-isomer | 1  | 87.267   | 6059717       | 17255       | 91.920 | 86.054   | 1471 | N/A        | N/A                  |

**Figure S12.** Chiral HPLC Analysis of **2d** (Scheme 3, bottom).  
Chiralcel OD-H  $\times$  2; eluent: hexane/*i*PrOH = 3000/1; flow rate: 0.1 mL/min.

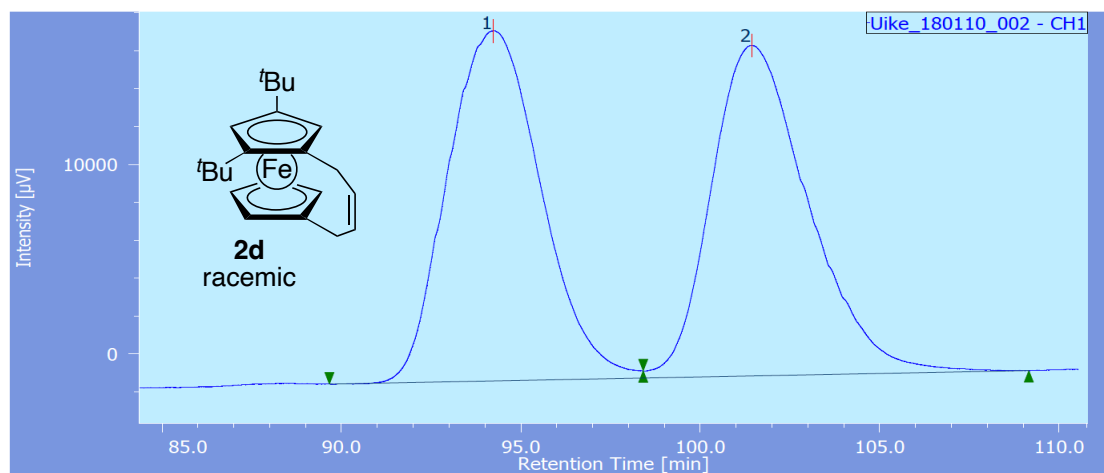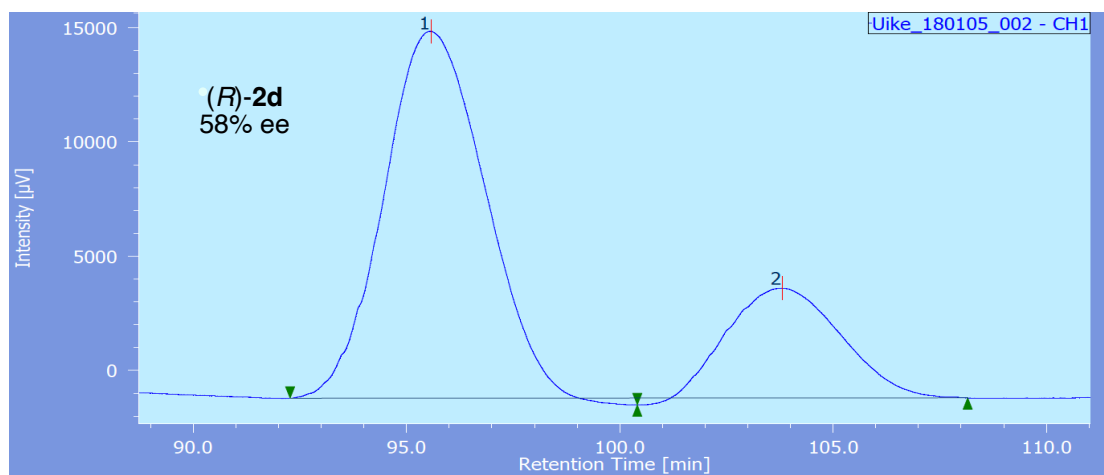

| # | peak name  | CH | tR [min] | area [μV·sec] | height [μV] | area % | height % | NTP  | resolution | symmetry coefficient |
|---|------------|----|----------|---------------|-------------|--------|----------|------|------------|----------------------|
| 1 | (R)-isomer | 1  | 95.575   | 2639640       | 16058       | 78.953 | 76.978   | 7486 | 1.729      | 1.080                |
| 2 | (S)-isomer | 1  | 103.800  | 703676        | 4802        | 21.047 | 23.022   | 6569 | N/A        | 1.140                |

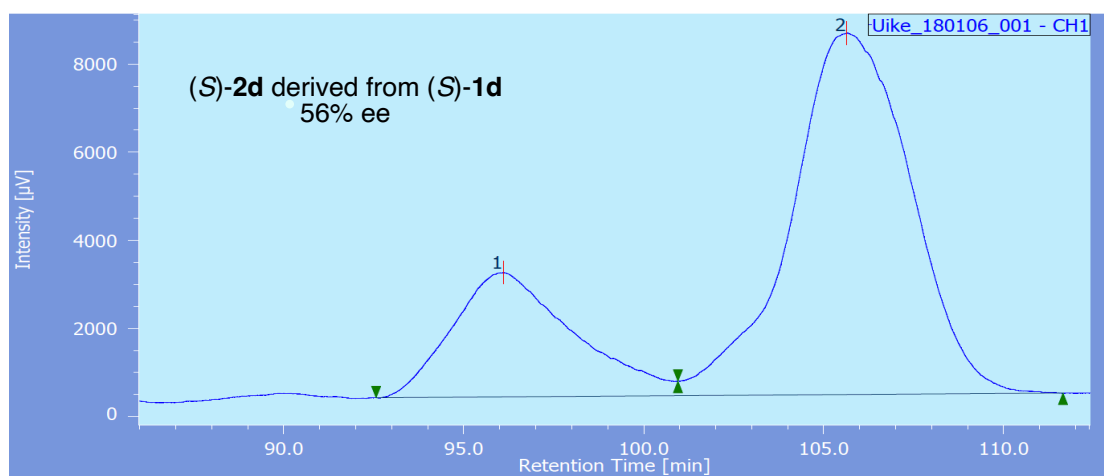

| # | peak name  | CH | tR [min] | area [μV·sec] | height [μV] | area % | height % | NTP  | resolution | symmetry coefficient |
|---|------------|----|----------|---------------|-------------|--------|----------|------|------------|----------------------|
| 1 | (R)-isomer | 1  | 96.100   | 537100        | 2820        | 22.031 | 25.582   | 3984 | 1.587      | N/A                  |
| 2 | (S)-isomer | 1  | 105.633  | 1900784       | 8204        | 77.869 | 74.418   | 5031 | N/A        | 0.937                |
